# Supplementary material
Source: PubMed Central journal article supplement (PMC7062164)
Supplement: supp_RA119.010589_155117_1_supp_468115_q4z7qc.pdf [file supp_RA119.010589_155117_1_supp_468115_q4z7qc.pdf]

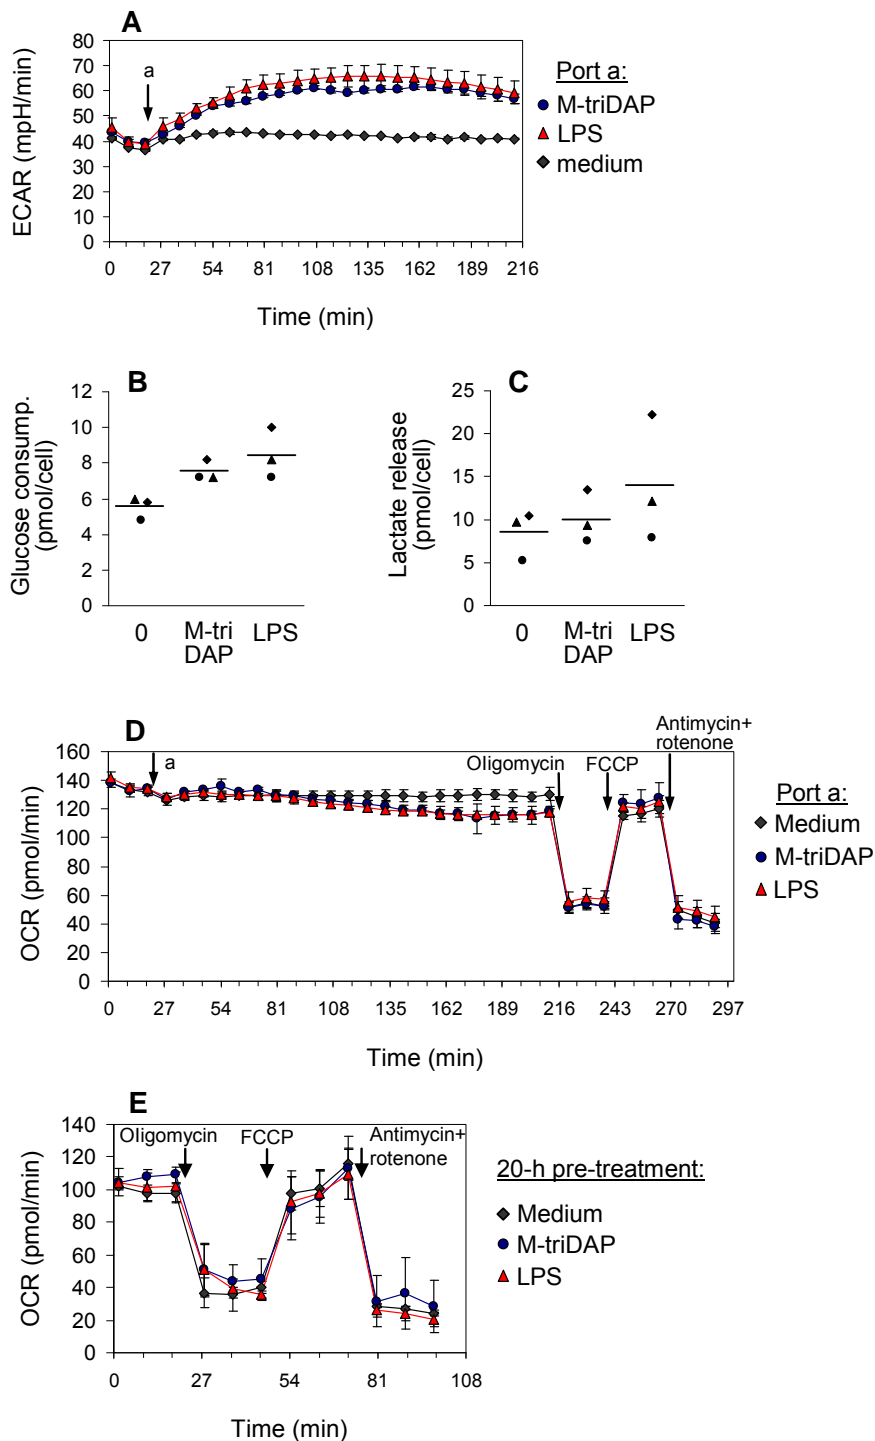

**Figure S1.** Additional characteristics of glucose and oxygen metabolism in MDM generated with M-CSF or GM-CSF. **A-C**, characteristics of glycolysis in MDM generated with M-CSF (M-MDM). M-MDM were stimulated with M-triDAP or LPS and assessed for ECAR (**A**), 24-h glucose consumption (**B**) and 24-h lactate release (**C**). 3 independent donors (one representative donor is shown in **A**). **D** and **E**, mitochondrial stress test in GM-CSF-generated MDM, untreated or treated by M-triDAP or LPS for 3 h (**D**) or 20 h (**E**). Mitochondrial stress test was performed by measuring OCR upon sequential injections of oligomycin, FCCP and antimycin A + rotenone as described (Everts et al, 2012). MDM show almost no spare respiratory capacity, because OCR after addition of FCCP does not exceed baseline OCR, and use most of oxygen consumed to sustain mitochondrial respiration, because OCR after addition of antimycin A and rotenone is around 30% of baseline OCR.

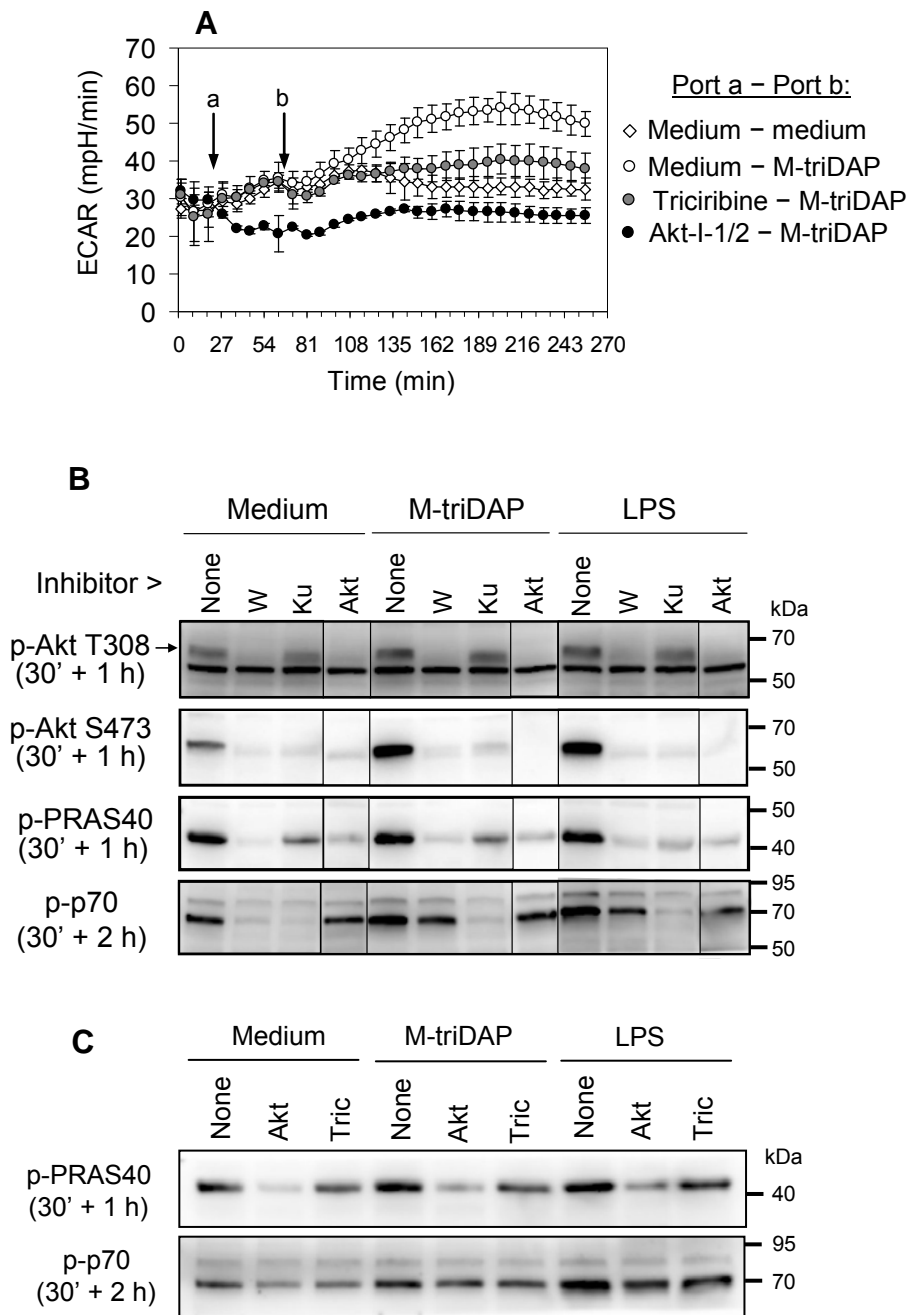

**Figure S2.** To the role of Akt in M-triDAP- or LPS-induced glycolytic responses of MDM. **A**, measurements of ECAR after addition of Akt-I-1/2 (10  $\mu$ M) or triciribine (20  $\mu$ M) and subsequent stimulation with M-triDAP. Mean  $\pm$  s.d. of quadruplicate wells, one representative donor out of 4. **B and C**, inhibition of Akt, PRAS40 and p70 phosphorylation in resting and stimulated MDM. Cells were pre-incubated for 30 min with medium, wortmannin (W, 100 nM), Ku 0063794 (Ku, 1  $\mu$ M), Akt-I-1/2 (Akt, 10  $\mu$ M) or triciribine (Tric, 20  $\mu$ M), then cultured for 1 h (p-Akt, p-PRAS40) or 2 h (p-p70) with medium, M-triDAP (10  $\mu$ g/ml) or LPS (100 ng/ml), whereafter phosphorylated kinases were assessed. One representative experiment out of 2 (B) or 3 (C). Arrow indicates specific bands for Akt/p-Akt (60 kD) and p-p70 (70 kD), vertical lines in B indicate individual gel boundaries.

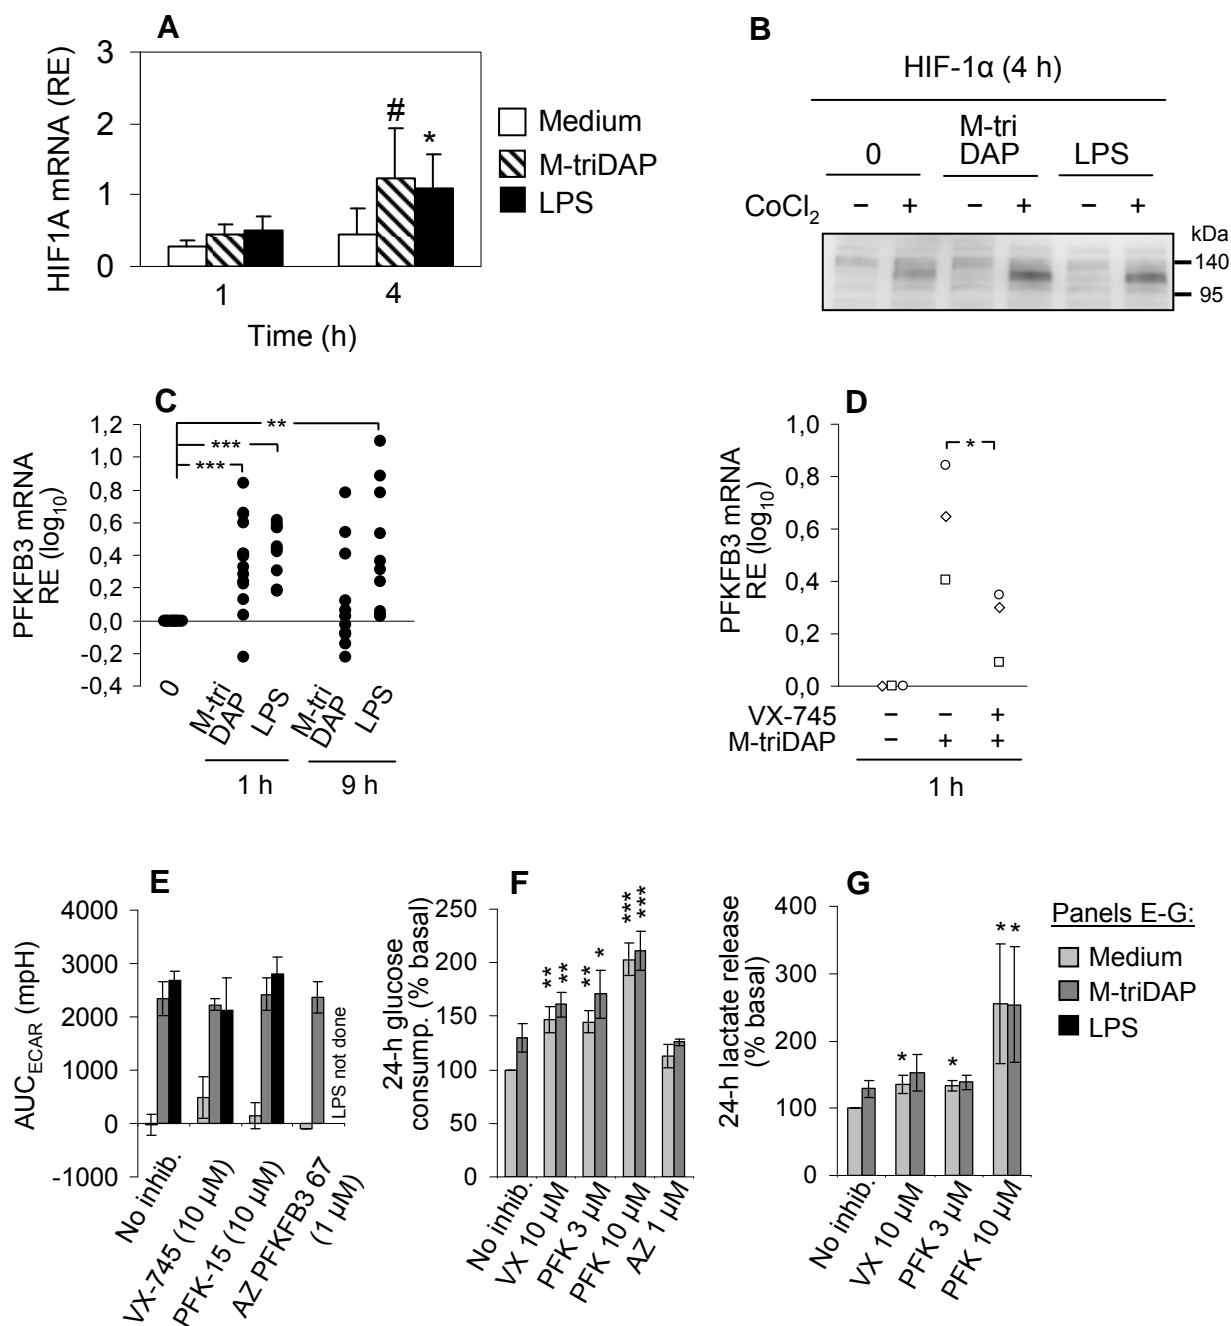

**Figure S3.** Induction of HIF1- $\alpha$  and PKFKB3 expression in MDM after triggering of NOD1 or TLR4. **A**, kinetics of HIF-1 $\alpha$  mRNA expression in MDM stimulated with M-triDAP (10  $\mu$ g/ml) or LPS (100 ng/ml). Mean  $\pm$  SD, 5 to 8 independent experiments per data point. \*  $p < 0.05$ , #  $p = 0.06$  compared to basal HIF1 $\alpha$  mRNA expression. **B**, HIF-1 $\alpha$  protein in MDM stimulated for 4 h with M-triDAP or LPS with or without addition of CoCl<sub>2</sub> (100  $\mu$ M) to mimick hypoxia. HIF-1 $\alpha$  gives a band of around 120 kDa. **C**, PKFKB3 mRNA expression in MDM upon stimulation with M-triDAP or LPS (11 donors). **D**, effect of p38 inhibitor pre-treatment (VX-745, 10  $\mu$ M) on PKFKB3 mRNA expression 1 h after addition of M-triDAP (3 experiments). **E**, **F** and **G**, effects of p38 (VX-745) and PKFKB3 inhibitors (AZ PFKFB3 67, PFK-15) on ECAR (**E**), 24-h glucose consumption (**F**) and lactate release (**G**) in basal conditions and upon M-triDAP stimulation (mean  $\pm$  SD, 4 donors). In **F** and **G**, asterisks denote  $p$ -values in relation to cells treated with M-triDAP without inhibitors.

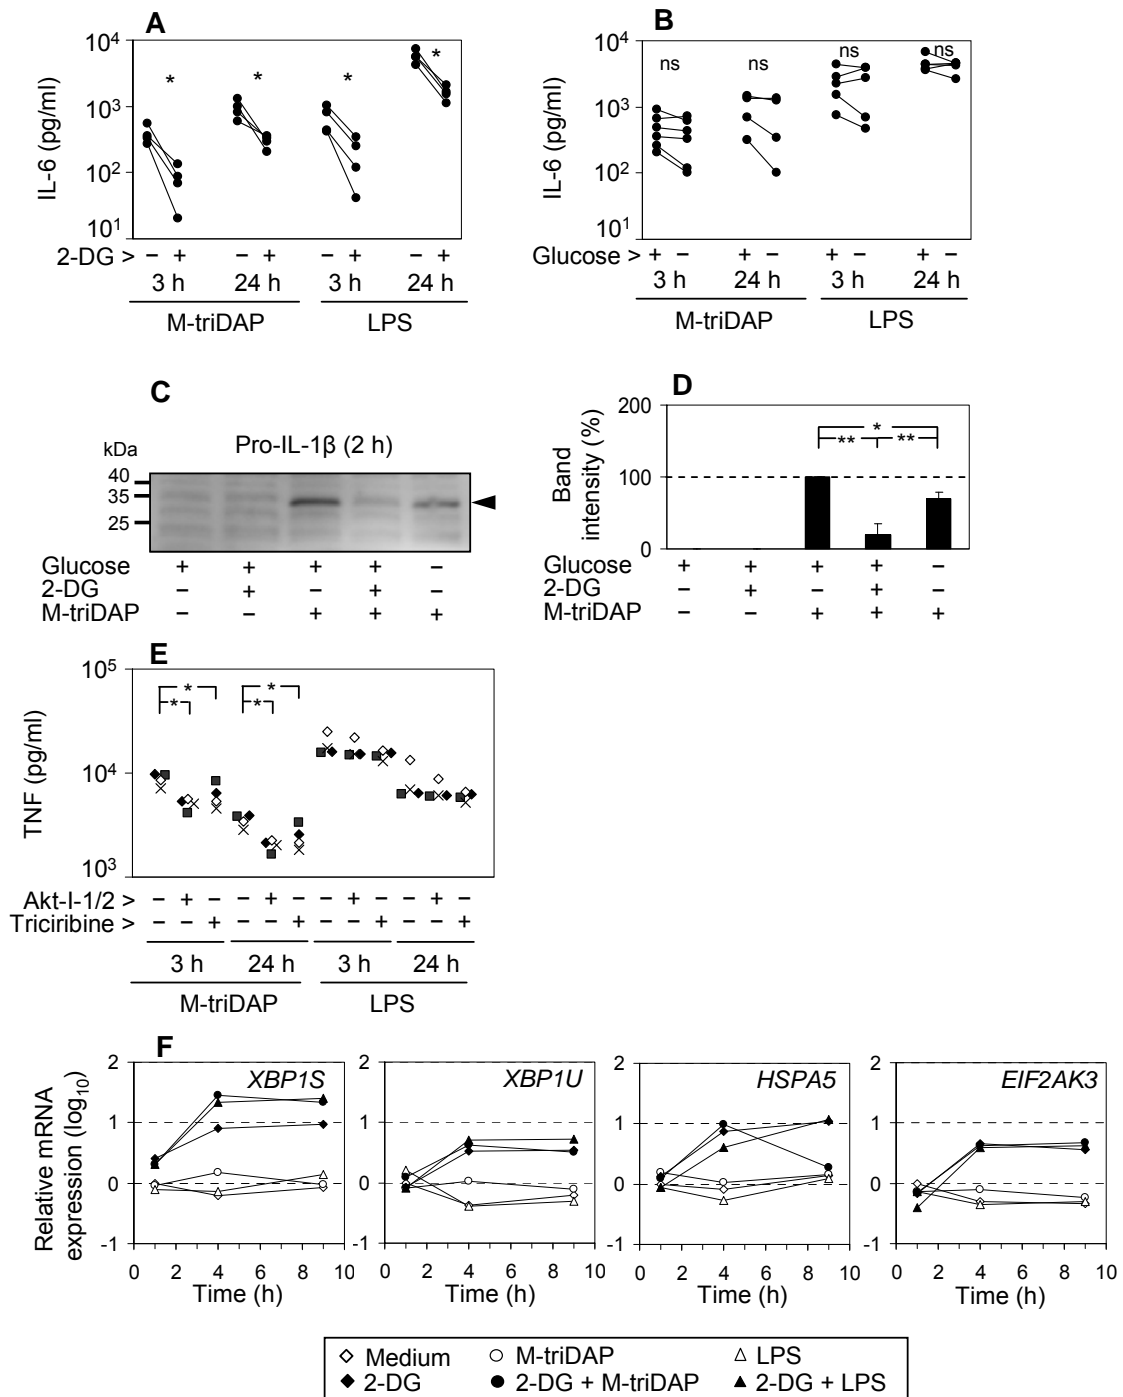

**Figure S4.** Additional data illustrating alterations of cytokine production by MDM under 2-DG or Akt inhibitor treatment or glucose starvation. **A and B**, effects of 2-DG (A) and glucose-free medium (B) on M-triDAP- or LPS-induced IL-6 production by MDM from individual donors. \*  $p < 0.05$ , ns, non significant (paired t-test). **C and D**, cells were pre-treated with 2-DG (50 mM) or glucose-free medium for 30 min, then cultured with or without M-triDAP for 2 h, whereafter levels of pro-IL-1 $\beta$  were assessed (C, a representative experiment; D, densitometry, mean  $\pm$  SD of 5 donors). **E**, effects of Akt-I-1/2 and tricirbine on TNF levels in supernatants 3 or 24 h after addition of M-triDAP or LPS (4 experiments, each designated by a unique symbol; \*  $p < 0.05$  by paired t-test). **F**, effects of 2-DG without or with PRR agonists on mRNA levels of UPR markers in MDM from a representative donor.

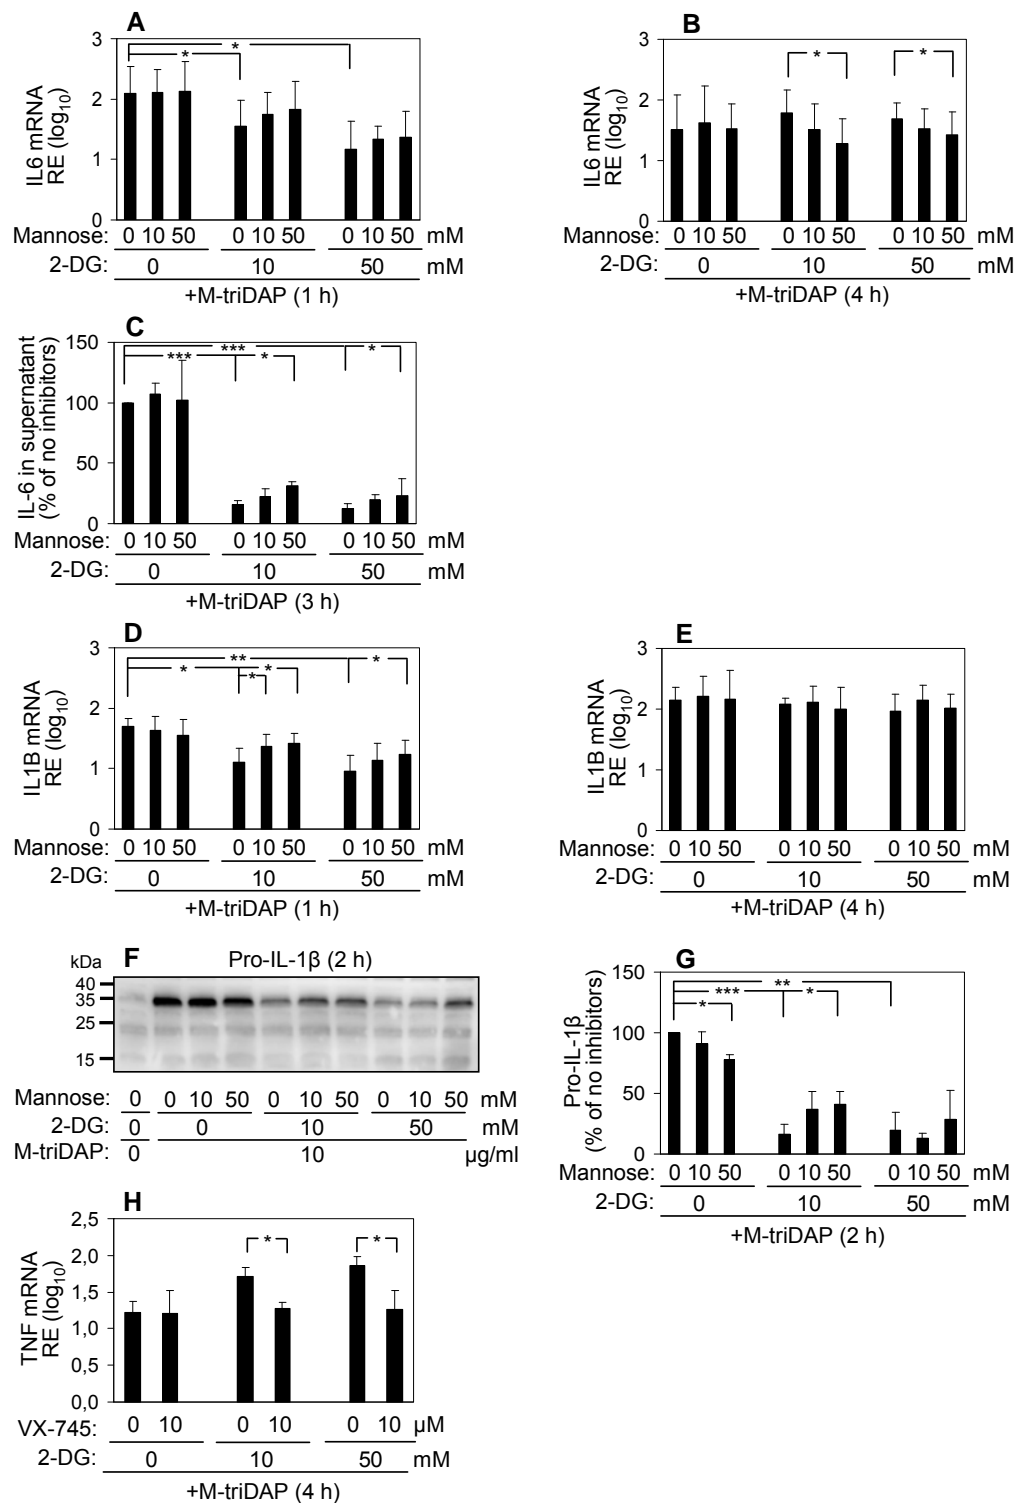

**Figure S5.** Effects of 2-DG, mannose and VX-745 on IL-6 and IL-1 $\beta$  production by M-triDAP-stimulated MDM. Cells were pre-treated for 30 min with 2-DG and/or D-mannose (A-G) or with VX-745 (H) at indicated concentrations in ordinary medium, stimulated with M-triDAP for indicated time periods, whereafter levels of IL-6 mRNA (A and B), IL-6 in supernatant (C), IL1 $\beta$  mRNA (D and E), intracellular pro-IL-1 $\beta$  (F and G) and TNF mRNA (H) were assessed. 3 experiments per data point, p-values by paired t-test. In C and G, results were normalized to cells treated with M-triDAP without 2-DG or mannose.

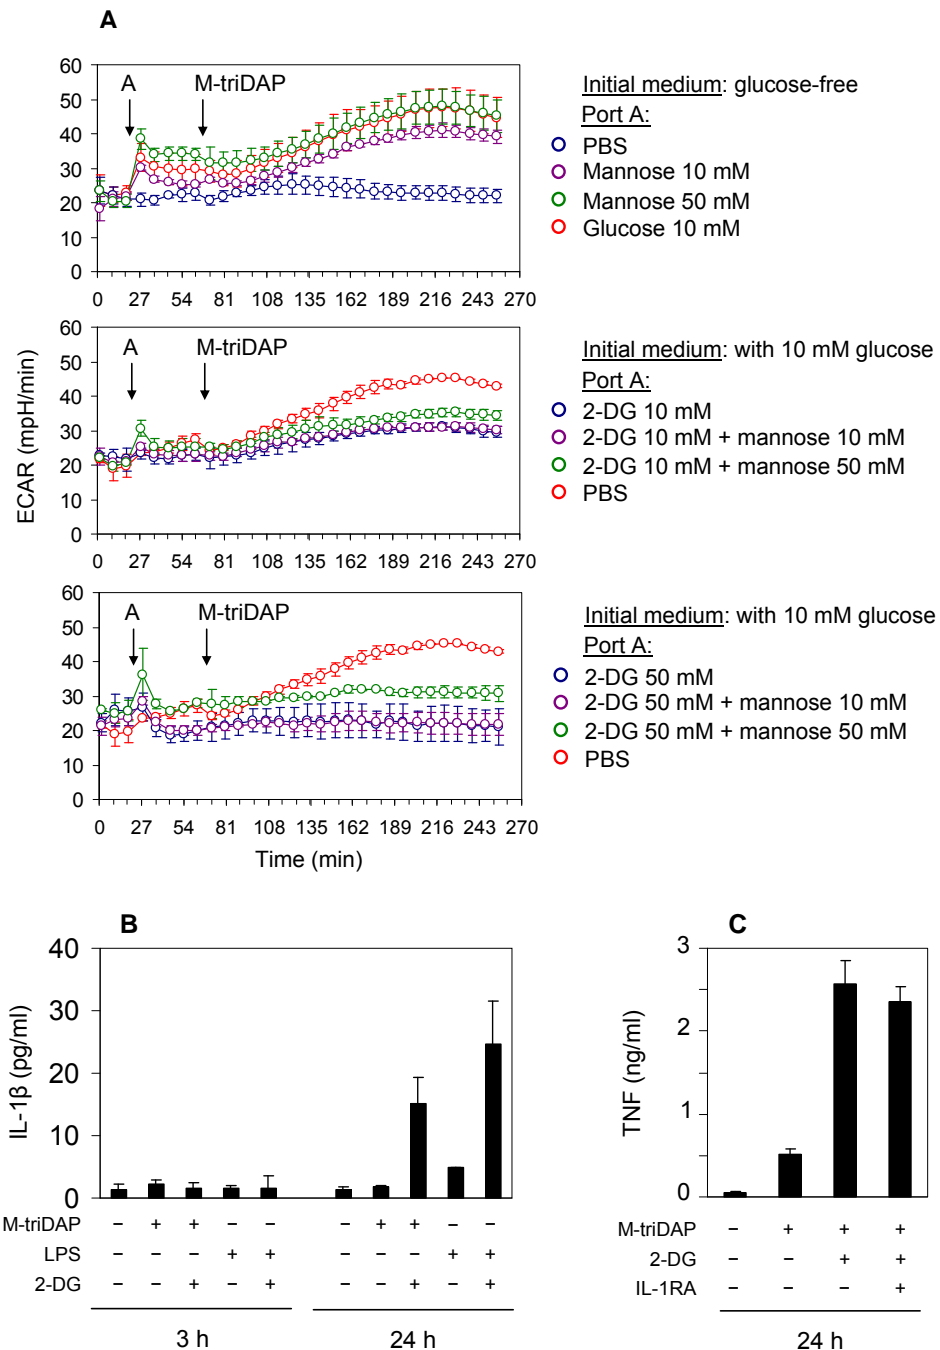

**Figure S6.** To the mechanisms of the modulatory effects of 2-DG and D-mannose on glycolysis and cytokine production by MDM. **A**, effects of D-mannose and 2-DG on glycolytic reprogramming of MDM. Cells were plated in glucose-free medium upper plot or ordinary medium (middle and lower plots). PBS, D-mannose and/or 2-DG were injected through ports A to indicated final concentrations, then M-triDAP was injected through ports B to 10  $\mu$ g/ml. Mean  $\pm$  SD of quadruplicate wells, one experiment out of 2 with similar results. **B**, effect of 2-DG (50 mM) on levels of IL-1 $\beta$  in supernatants secretion during 3-hour and 24-hour stimulation with M-triDAP. Mean  $\pm$  SD of triplicate wells, one experiment out of 2 with similar results. **C**, effect of IL-1RA (500 ng/ml) on 2-DG-mediated enhancement of TNF production induced by M-triDAP, mean  $\pm$  SD of 3 independent donors.

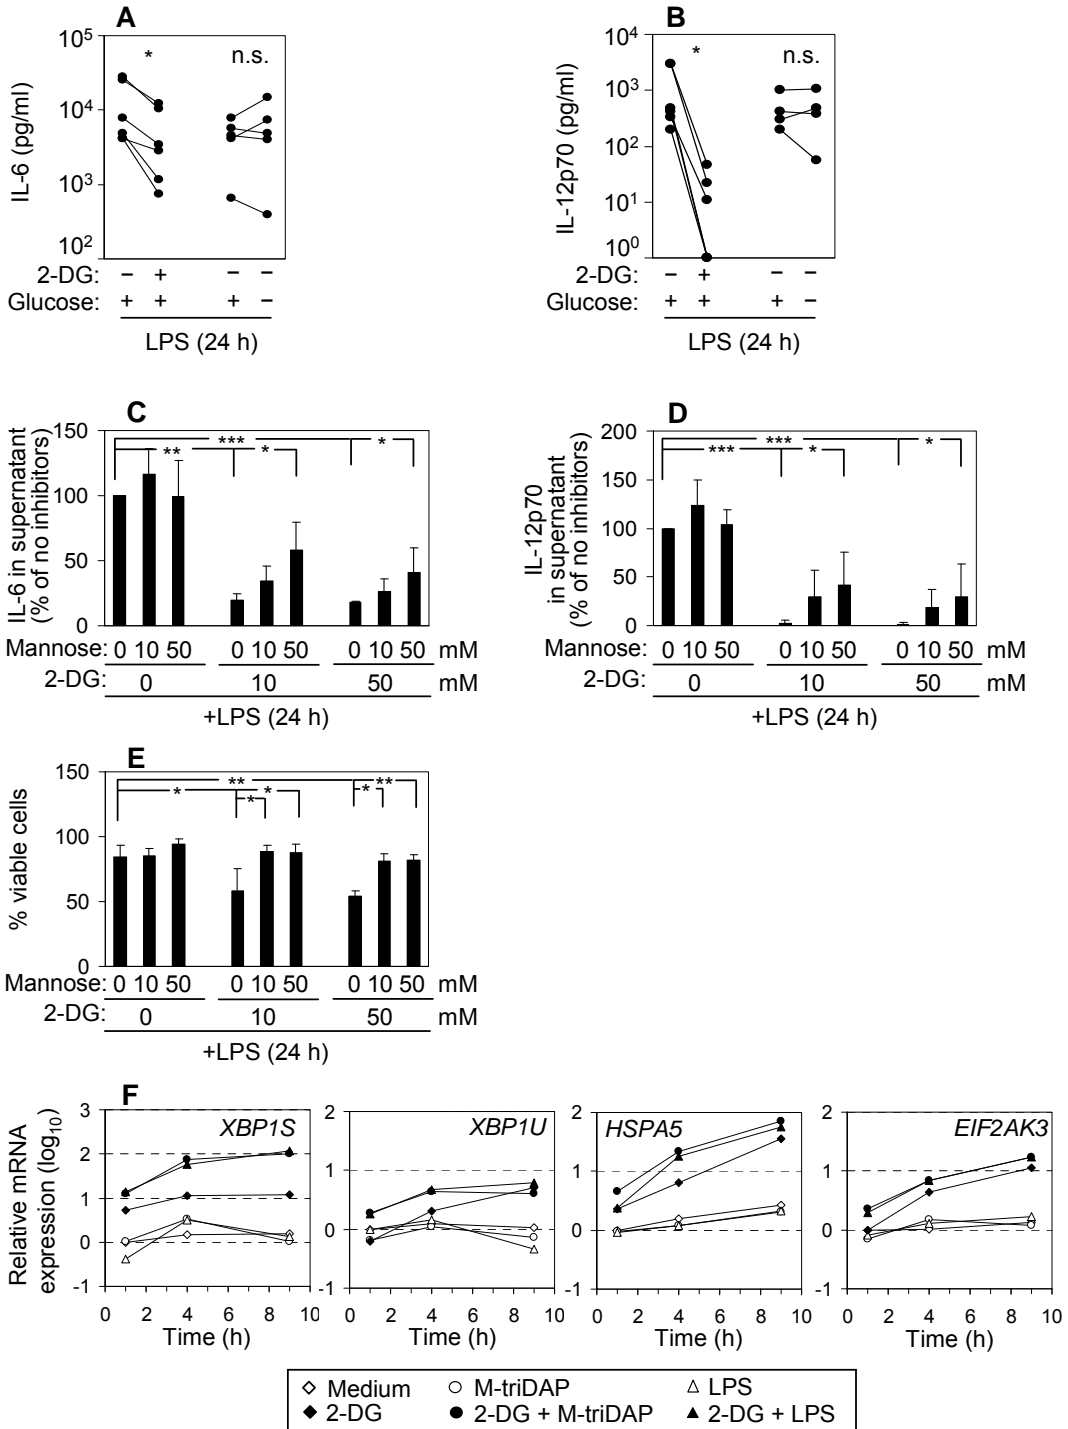

**Figure S7.** Additional data illustrating alterations of cytokine production by MDDC under 2-DG treatment or glucose starvation. **A and B**, effects of 2-DG and glucose-free medium on IL-6 (A) and IL-12p70 (B) production by MDDC upon M-triDAP or LPS treatment. **C and D**, influence of 2-DG and mannose on IL-6 (C) and IL-12p70 (D) production by LPS-stimulated MDDC (3 experiments per data point, results were normalized to cells treated with LPS without 2-DG or mannose, p-values by paired t-test). **E**, effects of 2-DG and mannose on viability of LPS-stimulated MDDC (3 experiments). Percentages of live cells were assessed by trypan blue exclusion. **F**, effects of 2-DG without or with PRR agonists on mRNA levels of UPR stress markers in MDDC from a representative donor.

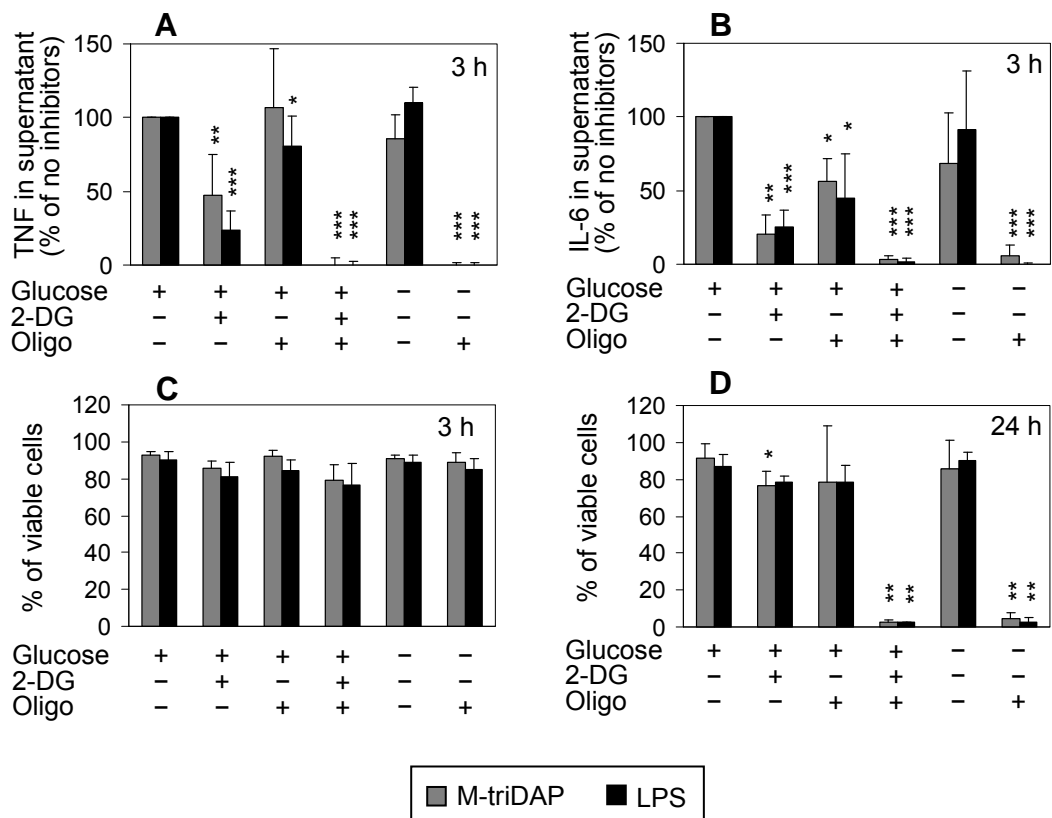

**Figure S8.** Cytokine production and viability of MDM in hypoxia-like conditions. MDM were pre-treated with 2-DG (50 mM), glucose-free medium and/or oligomycin (2  $\mu$ M) for 30 min, then activated with M-triDAP or LPS. TNF (A) and IL-6 (B) production was assessed at 3 h, viability of trypsinized cells was assessed by trypan-blue exclusion at 3 h (C) and 24 h (D). Mean  $\pm$  SD, p-values by paired t-test. Three to 10 independent experiments per data point.



**Table S1.** Enzyme inhibitors used in the study.

| <b>Inhibitor</b>                                             | <b>Target</b>                                                              | <b>Supplier</b> | <b>Final concentration</b> |
|--------------------------------------------------------------|----------------------------------------------------------------------------|-----------------|----------------------------|
| 2-deoxy-D-glucose (2-DG)                                     | Glycolysis (glucose-6-phosphate isomerase), N-linked protein glycosylation | Sigma           | 2-50 mM                    |
| Akt-I-1/2                                                    | Akt                                                                        | Tocris          | 10 $\mu$ M                 |
| Antimycin A                                                  | Mitochondrial complex III                                                  | Sigma           | 500 nM                     |
| AZ PFKFB3 67                                                 | PFKFB3                                                                     | Tocris          | 1 $\mu$ M                  |
| Carbonyl cyanide-4-(trifluoromethoxy)-phenylhydrazone (FCCP) | Mitochondrial electron transport chain                                     | Sigma           | 2 $\mu$ M                  |
| Ku 0063794                                                   | mTOR (both mTORC1 and mTORC2)                                              | Tocris          | 1 $\mu$ M                  |
| Oligomycin                                                   | Mitochondrial ATP synthase                                                 | Sigma           | 2 $\mu$ M                  |
| PFK-15                                                       | PFKFB3                                                                     | Tocris          | 1-10 $\mu$ M               |
| Rapamycin                                                    | mTORC1                                                                     | Merck Millipore | 10 nM                      |
| Rotenone                                                     | Mitochondrial complex I                                                    | Sigma           | 500 nM                     |
| Triciribine                                                  | Akt                                                                        | Tocris          | 20 $\mu$ M                 |
| VX-745                                                       | p38 MAPK                                                                   | Tocris          | 10 $\mu$ M                 |
| Wortmannin                                                   | PI-3 kinase                                                                | Sigma           | 100 nM                     |

**Table S2.** PCR primers used in the study.

| Gene                              | Gene full name                                            | Primer  | Sequence (5' → 3')       |
|-----------------------------------|-----------------------------------------------------------|---------|--------------------------|
| <i>ACOD1</i><br>( <i>IRG1</i> )   | Aconitate decarboxylase 1                                 | Forward | TGCAAGGCCGATTACTGCAT     |
|                                   |                                                           | Reverse | GAGCTTCTCGGCACTTTGTC     |
| <i>ACTB</i>                       | Actin beta                                                | Forward | GCACAGAGCCTCGCCTTT       |
|                                   |                                                           | Reverse | CACGATGGAGGGGAAGACG      |
| <i>EIF2AK3</i><br>( <i>PERK</i> ) | eukaryotic translation initiation factor 2 alpha kinase 3 | Forward | TTCAGCACTCAGATGGAGAGAG   |
|                                   |                                                           | Reverse | CGTTCCATGGGGGATGGAGA     |
| <i>GAPDH</i>                      | Glyceraldehyde 3-phosphate dehydrogenase                  | Forward | CAGCCTCCCGCTTCGCTCTC     |
|                                   |                                                           | Reverse | ACCAGGCGCCCAATACGACC     |
| <i>HIF1A</i>                      | Hypoxia inducible factor 1, alpha subunit                 | Forward | AGCCCTAACGTGTTATCTGTGC   |
|                                   |                                                           | Reverse | TCCATTTTTTCGCTTTCTCTGAGC |
| <i>HK1</i>                        | Hexokinase 1                                              | Forward | CAGCTCCTGGCCTATTACTTCA   |
|                                   |                                                           | Reverse | CCGGGAGAGGCCATTCTTC      |
| <i>HK2</i>                        | Hexokinase 2                                              | Forward | CCTGAGGACATCATGCGAGG     |
|                                   |                                                           | Reverse | TGGACTTGAATCCCTTGGTCC    |
| <i>HK3</i>                        | Hexokinase 3                                              | Forward | CATTGGGTCTTCAGGGTTGC     |
|                                   |                                                           | Reverse | TGTAGCTGTGCCCTTGTCAC     |
| <i>HSPA5</i><br>( <i>BiP</i> )    | Heat shock protein family A (Hsp70) member 5              | Forward | CATCAACGAGCCTACGGCAG     |
|                                   |                                                           | Reverse | TGGCCACAACCTTCGAAGACA    |
| <i>IL1B</i>                       | Interleukin 1B                                            | Forward | GAGCTCGCCAGTGAAATGATG    |
|                                   |                                                           | Reverse | TGGTGGTCGGAGATTCGTAG     |
| <i>IL6</i>                        | Interleukin 6                                             | Forward | GCCACTCACCTCTTCAGAACG    |
|                                   |                                                           | Reverse | TCAGCCATCTTTGGAAGGTTCA   |
| <i>LDHA</i>                       | Lactate dehydrogenase A                                   | Forward | TGCCTGTATGGAGTGGAAATGAA  |
|                                   |                                                           | Reverse | CCAGGATGTGTAGCCTTTGAGT   |
| <i>PFKFB3</i>                     | 6-phosphofructo-2-kinase / fructose-2,6-bisphosphatase 3  | Forward | AACTGACGCCTGTTCGCTTA     |
|                                   |                                                           | Reverse | CTCATGAGCGGGTTAGGTCC     |
| <i>PFKL</i>                       | Phosphofructokinase, liver type                           | Forward | GGGTGCCAAAGTCTTCCTCAT    |
|                                   |                                                           | Reverse | GGATGATGTTGGAGACGCTCA    |
| <i>PFKM</i>                       | Phosphofructokinase, muscle                               | Forward | GCCATCAGCCTTTGACAGAAT    |
|                                   |                                                           | Reverse | ACCTGGACACATTCCATGAGG    |
| <i>PKM1</i>                       | Pyruvate kinase, isoform M1                               | Forward | AGTGATGTGGCCAATGCAGTC    |
|                                   |                                                           | Reverse | AAACAGCTTGCGGTGGAAC      |
| <i>PKM2</i>                       | Pyruvate kinase, isoform M2                               | Forward | CTATCCTCTGGAGGCTGTGC     |
|                                   |                                                           | Reverse | TCTGTGGGGTTCGCTGGTAA     |
| <i>SLC2A1</i><br>( <i>GLUT1</i> ) | Solute carrier family 2, member 1                         | Forward | ATTGGCTCCGGTATCGTCAA     |
|                                   |                                                           | Reverse | ATGGCCACGATGCTCAGATA     |
| <i>SLC2A3</i><br>( <i>GLUT3</i> ) | Solute carrier family 2, member 3                         | Forward | GACCCAGAGATGCTGTAATGGT   |
|                                   |                                                           | Reverse | TGGCAAATATCAGAGCTGGGG    |
| <i>TNF</i>                        | Tumor necrosis factor                                     | Forward | TCGGCCCCCAGAGGGAAGAG     |
|                                   |                                                           | Reverse | CGGCGGTTTCAGCCACTGGAG    |
| <i>XBPI5</i>                      | X-box binding protein 1 (spliced mRNA)                    | Forward | CTGAGTCCGCAGCAGGTG       |
|                                   |                                                           | Reverse | CTCTGGGGAAGGGCATTGTA     |
| <i>XBPIU</i>                      | X-box binding protein 1 (unspliced mRNA)                  | Forward | TGGCCTTGTAGTTGAGAACCA    |
|                                   |                                                           | Reverse | TGCACGTAGTCTGAGTGCTG     |
